# Supplementary material
Source: MDPI journal article supplement (https://www.mdpi.com/2071-1050/16/5/1844)
Supplement: s1 [file s1]

Table S1. Plant communities with *Silaum silaus*.

| Number of relevé                                               | 1          | 2   | 3   | 4   | 5   | 6   | 7   | 8   | 9   | 10  | Constancy degree | Cover coefficient | 11         | 12  | 13  | 14  | 15  | 16  | 17  | 18  | 19  | 20  | Constancy degree | Cover coefficient |      |     |
|----------------------------------------------------------------|------------|-----|-----|-----|-----|-----|-----|-----|-----|-----|------------------|-------------------|------------|-----|-----|-----|-----|-----|-----|-----|-----|-----|------------------|-------------------|------|-----|
| Locality                                                       | Jaćmierz   |     |     |     |     |     |     |     |     |     |                  |                   | Zagórzycze |     |     |     |     |     |     |     |     |     |                  |                   |      |     |
| Date [day, month, year]                                        | 14.07.2020 |     |     |     |     |     |     |     |     |     |                  |                   | 18.07.2020 |     |     |     |     |     |     |     |     |     |                  |                   |      |     |
| Altitude [m a.s.l.]                                            | 279        | 279 | 279 | 279 | 280 | 280 | 280 | 280 | 280 | 280 |                  |                   | 108        | 108 | 108 | 108 | 108 | 108 | 108 | 108 | 108 | 108 |                  |                   | 108  | 108 |
| Area of relevé [m²]                                            | 25         | 25  | 25  | 25  | 25  | 25  | 25  | 25  | 25  | 25  |                  |                   | 25         | 25  | 25  | 25  | 25  | 25  | 25  | 25  | 25  | 25  |                  |                   | 25   |     |
| Cover of herb layer [%]                                        | 100        | 100 | 100 | 100 | 100 | 100 | 100 | 100 | 100 | 100 |                  |                   | 100        | 100 | 100 | 100 | 100 | 100 | 100 | 100 | 100 | 100 |                  |                   | 100  |     |
| Cover of moss layer [%]                                        | 10         | 20  | 5   | 5   | 1   | 2   | 5   | 1   | 5   | 2   |                  |                   | 10         | 15  | 15  | 5   | 5   | 5   | 5   | 10  | 20  | 20  |                  |                   |      |     |
| Number of species                                              | 46         | 48  | 43  | 41  | 42  | 35  | 35  | 42  | 39  | 36  | 42               | 40                | 39         | 47  | 43  | 41  | 38  | 42  | 39  | 42  |     |     |                  |                   |      |     |
| <b>ChAss. Arrhenatheretum elatioris</b>                        |            |     |     |     |     |     |     |     |     |     |                  |                   |            |     |     |     |     |     |     |     |     |     |                  |                   |      |     |
| <i>Arrhenatherum elatius</i>                                   | 3          | 3   | 1   | +   | +   | +   | 1   | 3   | 3   | 1   | V                | 1665              | + + + + +  |     |     |     |     |     |     |     |     |     | III              | 25                |      |     |
| <i>Geranium pratense</i>                                       | 3          | 4   | 2   | 2   | 2   | 2   | 2   | 3   | 1   | 1   | V                | 2350              |            |     |     |     |     |     |     |     |     |     |                  |                   |      |     |
| <b>ChAll. Arrhenatherion elatioris</b>                         |            |     |     |     |     |     |     |     |     |     |                  |                   |            |     |     |     |     |     |     |     |     |     |                  |                   |      |     |
| <i>Crepis biennis</i>                                          | 1          | 1   | 1   | +   | +   | 1   | 1   | +   | +   | 1   | V                | 320               |            |     |     |     |     |     |     |     |     |     |                  |                   |      |     |
| <i>Galium mollugo</i>                                          | 1          | 1   | +   | +   |     | +   |     | +   | +   | +   | IV               | 130               | +          |     |     |     |     |     |     |     |     |     |                  | I                 | 10   |     |
| <i>Knautia arvensis</i>                                        | +          | +   | +   |     |     |     |     | +   | +   | +   | III              | 30                |            |     |     |     |     |     |     |     |     |     |                  |                   |      |     |
| <i>Campanula patula</i>                                        | +          |     |     |     |     |     |     |     |     |     | I                | 5                 |            | +   | +   | +   |     |     | +   | +   |     | III | 25               |                   |      |     |
| <i>Tragopogon pratensis</i>                                    | +          | +   |     |     |     |     |     |     |     |     | I                | 10                |            |     |     |     |     |     |     |     |     |     |                  |                   |      |     |
| <b>ChO. Arrhenatheretalia elatioris</b>                        |            |     |     |     |     |     |     |     |     |     |                  |                   |            |     |     |     |     |     |     |     |     |     |                  |                   |      |     |
| <i>Lotus corniculatus</i>                                      | 1          | 1   | 1   | 1   | 1   | 1   | 2   | 1   | 1   | 1   | V                | 625               | +          | +   | +   |     |     |     |     |     | +   | +   | III              | 25                |      |     |
| <i>Achillea millefolium</i>                                    | +          | +   | +   | +   | +   | +   | +   | +   | +   | 1   | V                | 95                |            |     |     |     |     |     |     |     |     |     | III              | 25                |      |     |
| <i>Trifolium repens</i>                                        | 2          | 1   | 1   | 1   | 1   | 1   | 1   | +   | 1   |     | V                | 530               |            |     |     |     |     |     |     |     |     |     |                  |                   |      |     |
| <i>Leucanthemum vulgare</i>                                    | 1          | +   | +   | 1   | +   | 1   | 1   | +   |     | +   | V                | 225               |            |     |     |     |     |     |     |     |     |     |                  | 5                 |      |     |
| <i>Dactylis glomerata</i>                                      | +          | +   | +   | +   |     |     |     | +   |     |     | III              | 25                |            |     |     |     |     |     |     |     |     |     |                  | 10                |      |     |
| <i>Pimpinella major</i>                                        | 2          | 1   | 2   |     |     | +   | 2   | 2   | +   |     | IV               | 760               |            |     |     |     |     |     |     |     |     |     |                  |                   |      |     |
| <i>Trisetum flavescens</i>                                     | 1          | 1   | 1   | +   | +   |     | +   | 1   |     |     | IV               | 215               |            |     |     |     |     |     |     |     |     |     |                  |                   |      |     |
| <i>Daucus carota</i>                                           | 1          | 1   | 1   |     |     |     | 1   | +   | +   |     | III              | 210               |            |     |     |     |     |     |     |     |     |     |                  |                   |      |     |
| <i>Heracleum sphondylium</i>                                   |            | +   | +   |     |     |     | +   |     | +   |     | II               | 20                |            |     |     |     |     |     |     |     |     |     |                  |                   |      |     |
| <i>Taraxacum officinale</i>                                    | +          | +   |     | +   |     |     |     | +   |     |     | II               | 20                |            |     |     |     |     |     |     |     |     |     |                  |                   |      |     |
| <b>ChAss. Molinietum caeruleae = ChAll. Molinion caeruleae</b> |            |     |     |     |     |     |     |     |     |     |                  |                   |            |     |     |     |     |     |     |     |     |     |                  |                   |      |     |
| <i>Silaum silaus</i>                                           | 1          | 2   | 3   | 3   | 3   | 3   | 4   | 2   | 2   | 3   | V                | 3075              | 1          | 2   | 1   | 1   | 2   | 1   | 1   | +   | 1   | 1   | V                | 705               |      |     |
| <i>Molinia caerulea</i>                                        |            |     |     |     |     |     |     |     |     |     |                  |                   | 3          | 3   | 2   | 3   | 3   | 3   | 3   | 3   | 3   | 3   | 4                | V                 | 3800 |     |
| <i>Galium boreale</i>                                          |            |     |     |     |     |     |     |     |     |     |                  |                   | 1          | +   | 3   | 3   | 3   | 3   | 2   | 2   | 2   | 2   |                  | V                 | 2255 |     |
| <i>Betonica officinalis</i>                                    |            |     |     |     |     |     |     |     |     |     |                  |                   | 2          | 2   | 3   | 2   | 2   | 3   | 2   | 1   | 3   | 2   |                  | V                 | 2225 |     |
| <i>Carex tomentosa</i>                                         |            |     |     |     |     |     |     |     |     |     |                  |                   | 1          | +   | +   | +   | 1   |     |     | +   | +   |     |                  | IV                | 125  |     |
| <i>Selinum carvifolia</i>                                      |            |     |     |     |     |     |     |     |     |     |                  |                   | +          |     |     |     |     | +   | +   |     | +   |     |                  | III               | 25   |     |
| <i>Inula salicina</i>                                          |            |     |     |     |     |     |     |     |     |     |                  |                   |            | +   | 2   | 3   |     | 1   | +   | 2   |     |     |                  | III               | 785  |     |
| <i>Dianthus superbus</i>                                       |            |     |     |     |     |     |     |     |     |     |                  |                   |            | +   |     | +   |     |     | +   | +   | +   |     |                  | III               | 25   |     |
| <i>Succisa pratensis</i>                                       |            |     |     |     |     |     |     |     |     |     |                  |                   | +          |     |     |     | +   | +   | 1   |     |     |     |                  | II                | 65   |     |

[illegible]

|                                       |   |   |   |   |   |   |   |   |   |     |      |     |   |   |   |   |   |   |   |   |    |     |      |     |   |     |     |    |   |    |     |    |
|---------------------------------------|---|---|---|---|---|---|---|---|---|-----|------|-----|---|---|---|---|---|---|---|---|----|-----|------|-----|---|-----|-----|----|---|----|-----|----|
| <i>Lathyrus pratensis</i>             | + | + | + |   | + | + | + | + | + | V   | 45   | +   |   |   | + | + | + |   |   |   | II | 20  |      |     |   |     |     |    |   |    |     |    |
| <i>Centaurea jacea</i>                | 2 | 2 | 2 | 2 | 1 | 2 | 2 | 2 | 2 | V   | 1625 | +   |   |   |   |   |   | + |   |   | I  | 10  |      |     |   |     |     |    |   |    |     |    |
| <i>Festuca rubra</i>                  |   |   |   | + |   |   |   |   | + | I   | 10   | 1   |   | 2 | 2 | 2 |   | 3 | 1 | 2 | 1  | IV  | 1225 |     |   |     |     |    |   |    |     |    |
| <i>Phleum pratense</i>                |   |   |   | + | 1 | + |   | + | + | III | 70   | +   |   |   | + | 1 |   | 1 |   |   | +  | III | 115  |     |   |     |     |    |   |    |     |    |
| <i>Trifolium pratense</i>             | 1 | 1 | + | + |   | + | + | + | 1 | V   | 180  |     |   |   |   |   |   |   |   |   |    |     |      |     |   |     |     |    |   |    |     |    |
| <i>Ranunculus acris</i>               | + | + | + | + |   |   |   | + | 1 | III | 75   | +   | + | + |   |   |   |   |   |   |    | II  | 15   |     |   |     |     |    |   |    |     |    |
| <i>Rumex acetosa</i>                  | + | + | + | + | + |   | + |   | + | IV  | 35   |     |   |   | + |   |   |   |   |   | +  | I   | 10   |     |   |     |     |    |   |    |     |    |
| <i>Vicia cracca</i>                   |   | + |   | + | + | + | + | + | + | IV  | 85   |     |   |   |   |   |   |   |   |   |    |     |      |     |   |     |     |    |   |    |     |    |
| <i>Festuca pratensis</i>              |   |   |   | + | + | + |   | + | + | III | 25   |     |   |   |   |   | + |   |   |   |    | I   | 5    |     |   |     |     |    |   |    |     |    |
| <i>Leontodon hispidus</i>             | + | + |   |   |   |   |   |   |   | I   | 10   |     |   |   | + |   |   |   |   |   |    | I   | 5    |     |   |     |     |    |   |    |     |    |
| <b>ChCl. Festuco-Brometea</b>         |   |   |   |   |   |   |   |   |   |     |      |     |   |   |   |   |   |   |   |   |    |     |      |     |   |     |     |    |   |    |     |    |
| <i>Filipendula vulgaris</i>           |   |   |   |   |   |   |   |   |   |     | II   | 15  | + | 2 | 1 | 2 | 2 | + | 1 | + | +  | +   | V    | 650 |   |     |     |    |   |    |     |    |
| <i>Plantago media</i>                 | + | + | + |   |   |   |   |   |   |     | I    | 5   |   |   |   |   |   |   |   |   |    |     |      |     |   |     |     |    |   |    |     |    |
| <i>Bromus inermis</i>                 |   |   |   |   |   |   |   |   |   |     | I    | 5   |   |   |   |   |   |   |   |   |    |     |      |     |   |     |     |    |   |    |     |    |
| <i>Campanula glomerata</i>            |   |   |   |   |   |   |   |   |   |     | I    | 5   |   |   |   |   |   |   |   |   |    |     |      |     |   |     |     |    |   |    |     |    |
| <b>ChCl. Trifolio-Geranietea</b>      |   |   |   |   |   |   |   |   |   |     |      |     |   |   |   |   |   |   |   |   |    |     |      |     |   |     |     |    |   |    |     |    |
| <i>Galium verum</i>                   |   |   |   |   |   |   |   |   |   |     | III  | 75  | + |   | 2 | 1 |   | 1 | 1 | + | +  |     | IV   | 340 |   |     |     |    |   |    |     |    |
| <i>Agrimonia eupatoria</i>            |   |   |   |   |   |   |   |   |   |     |      |     | + |   |   | + |   | + |   | + |    | II  | 20   |     |   |     |     |    |   |    |     |    |
| <i>Clinopodium vulgare</i>            | + |   |   |   |   |   |   |   |   |     | I    | 5   |   |   |   |   |   |   |   |   |    |     |      |     |   |     |     |    |   |    |     |    |
| <i>Vicia sepium</i>                   | + |   |   |   |   |   |   |   |   |     | I    | 5   |   |   |   |   |   |   |   |   |    |     |      |     |   |     |     |    |   |    |     |    |
| <b>ChCl. Nardo-Callunetea</b>         |   |   |   |   |   |   |   |   |   |     |      |     |   |   |   |   |   |   |   |   |    |     |      |     |   |     |     |    |   |    |     |    |
| <i>Potentilla erecta</i>              |   |   |   |   |   |   |   |   |   |     |      |     | 1 | 1 | 1 | 1 | + | 1 | 1 | + | 1  | 1   | V    | 410 |   |     |     |    |   |    |     |    |
| <i>Luzula campestris</i>              |   |   |   |   |   |   |   |   |   |     |      |     |   | 1 | + | + | + | 1 | + | + | +  | V   | 135  |     |   |     |     |    |   |    |     |    |
| <i>Agrostis capillaris</i>            |   |   |   |   |   |   |   |   |   |     |      |     | + | + |   | + |   | 1 | + | + | 1  | IV  | 125  |     |   |     |     |    |   |    |     |    |
| <i>Danthonia decumbens</i>            |   |   |   |   |   |   |   |   |   |     |      |     |   | + | + |   |   |   | + | + | II | 20  |      |     |   |     |     |    |   |    |     |    |
| <i>Viola canina</i>                   |   |   |   |   |   |   |   |   |   |     |      |     |   |   |   |   |   |   | + | + | I  | 10  |      |     |   |     |     |    |   |    |     |    |
| <i>Cuscuta epithymum</i>              |   |   |   |   |   |   |   |   |   |     | I    | 5   |   |   |   |   |   |   |   |   |    |     |      |     |   |     |     |    |   |    |     |    |
| <b>ChCl. Artemisietea vulgaris</b>    |   |   |   |   |   |   |   |   |   |     |      |     |   |   |   |   |   |   |   |   |    |     |      |     |   |     |     |    |   |    |     |    |
| <i>Glechoma hederacea</i>             | 1 | 1 | + |   | + |   |   |   |   |     | III  | 115 | + | + | + |   | + |   |   |   |    |     | II   | 20  |   |     |     |    |   |    |     |    |
| <i>Cirsium arvense</i>                |   |   |   |   |   |   |   |   |   |     |      |     |   |   |   |   |   |   |   |   |    |     | +    | +   |   |     |     |    |   | I  | 10  |    |
| <i>Solidago gigantea</i>              |   |   |   |   |   |   |   |   |   |     |      |     |   |   |   |   |   |   |   |   |    |     | +    |     |   |     |     |    | I | 10 |     |    |
| <b>ChCl. Epilobietea angustifolii</b> |   |   |   |   |   |   |   |   |   |     |      |     |   |   |   |   |   |   |   |   |    |     |      |     |   |     |     |    |   |    |     |    |
| <i>Calamagrostis epigejos</i>         |   |   |   |   |   |   |   |   |   |     | II   | 450 | 1 |   |   |   |   |   | + | 1 |    |     |      |     |   | III | 535 |    |   |    |     |    |
| <i>Centaureum erythraea</i>           |   |   |   |   |   |   |   |   |   |     |      |     | + | 1 | + |   |   |   |   |   | +  |     |      |     |   |     | IV  | 80 |   |    |     |    |
| <i>Fragaria vesca</i>                 |   |   |   |   |   |   |   |   |   |     |      |     |   |   |   |   |   |   |   |   |    |     | +    | +   |   |     |     |    |   | I  | 10  |    |
| <b>ChCl. Phragmitetea</b>             |   |   |   |   |   |   |   |   |   |     |      |     |   |   |   |   |   |   |   |   |    |     |      |     |   |     |     |    |   |    |     |    |
| <i>Carex gracilis</i>                 |   |   |   |   |   |   |   |   |   |     | I    | 10  |   |   |   |   |   |   |   |   |    |     | 1    | +   |   |     |     |    |   | I  | 55  |    |
| <i>Peucedanum palustre</i>            |   |   |   |   |   |   |   |   |   |     |      |     |   |   |   |   |   |   |   |   |    |     | +    | 2   |   |     |     |    |   | II | 185 |    |
| <i>Galium palustre</i>                |   |   |   |   |   |   |   |   |   |     |      |     |   |   |   |   |   |   |   |   |    |     |      | +   | + |     |     |    |   |    | I   | 10 |

[illegible]
